# Supplementary material
Source: PubMed Central journal article supplement (PMC5838601)
Supplement: jamacardiol-3-144-s001.pdf [file jamacardiol-3-144-s001.pdf]

## Supplementary Online Content

Ferencik M, Mayrhofer T, Bittner DO, et al. Use of high-risk coronary atherosclerotic plaque detection for risk stratification of patients with stable chest pain: a secondary analysis of the PROMISE randomized clinical trial. *JAMA Cardiol*. Published online January 10, 2018. doi:10.1001/jamacardio.2017.4973.

**eFigure 1.** Evaluation of Coronary CTA Datasets for the Detection of Coronary Plaque, Stenosis, and High-risk Plaque Features

**eFigure 2.** Kaplan–Meier Estimates of the Composite Secondary End Point of Cardiovascular Death, Myocardial Infarction, or Hospitalization for Unstable Angina and Tertiary End Point of Death, or Myocardial Infarction as a Function of Time After Randomization.

**eFigure 3.** Major Adverse Cardiovascular Event Rate (Death, Non-Fatal Myocardial Infarction, or Hospitalization for Unstable Angina) Stratified by the Degree of Stenosis and Presence of High-Risk Plaque

**eTable 1.** Results of Univariable and Multivariable Cox Proportional Hazard Analysis Demonstrating the Predictive Value of High-Risk Plaque for the Outcome of Major Adverse Cardiovascular Events (Death, Non-Fatal Myocardial Infarction, or Hospitalization for Unstable Angina Pectoris)

**eTable 2.** Results of Univariable and Multivariable Cox Proportional Hazard Analysis Demonstrating the Predictive Value of the Presence of any Coronary Plaque, High-Risk Plaque, and Significant Coronary Stenosis for the Outcome of Major Adverse Cardiovascular Events (Death, Non-Fatal Myocardial Infarction, or Hospitalization for Unstable Angina Pectoris)

**eTable 3.** Results of Univariable and Multivariable Cox Proportional Hazard Analysis Demonstrating the Predictive Value of High-Risk Plaque for the Outcome of Major Adverse Cardiovascular Events (Death, Non-Fatal Myocardial Infarction, or Hospitalization for Unstable Angina Pectoris) in Patient Subgroups

This supplementary material has been provided by the authors to give readers additional information about their work.

**eFigure 1. Evaluation of Coronary CTA Datasets for the Detection of Coronary Plaque, Stenosis, and High-risk Plaque Features.**

Coronary CTA images were evaluated in axial and multiplanar reformatted images.

**Panel A** Any structure with a density of  $\geq 130$  HU that could be visualized separately from the contrast-enhanced coronary lumen, could be assigned to the coronary artery wall, and could be identified in at least two independent planes was defined as calcified plaque (arrow). The image shows calcified plaque in the proximal left anterior

descending coronary artery and the degree of stenosis was graded as 1-29%. **Panel B**

If both calcified (arrowhead) and non-calcified plaque components were present, the plaque was classified as partially calcified. The partially calcified plaque in the mid right coronary artery was causing 70-99% stenosis (arrow). **Panel C**

Non-calcified coronary plaque was defined as any discernible structure that could be assigned to the coronary artery wall, had a CT number below the contrast-enhanced coronary lumen, but above the surrounding connective tissue, and could be identified in at least two independent planes. The example shows non-calcified plaque (arrowheads) in the left circumflex

coronary artery with 30-49% stenosis. This example also shows a high-risk plaque feature of low CT attenuation. If low CT attenuation was visually noted in non-calcified plaque, readers placed three random region-of-interest measurements (approximately  $0.5\text{-}1.0\text{ mm}^2$ ) in the non-calcified low CT attenuation portion of the plaque. Low CT

attenuation plaque was defined as the mean CT number within these three regions of interest  $< 30$  HU. **Panel D**

Large non-calcified plaque (arrow) in the proximal left anterior descending coronary artery with positive remodeling. **Panel E**

Positive remodeling was assessed visually in multiplanar reformatted images reconstructed in long axis and short axis view of the vessel. Additional manual measurements of outer vessel diameter were performed at readers' discretion and threshold of 1.1 (ratio of outer vessel diameter at the plaque site – arrow – divided by outer vessel diameter at reference site –

arrowhead) was used to define positive remodeling. **Panel F** The napkin ring sign was defined as a ring-like peripheral higher attenuation (arrowhead) with central low CT attenuation non-calcified portion of the coronary plaque (arrow) in the cross-sectional view of the vessel

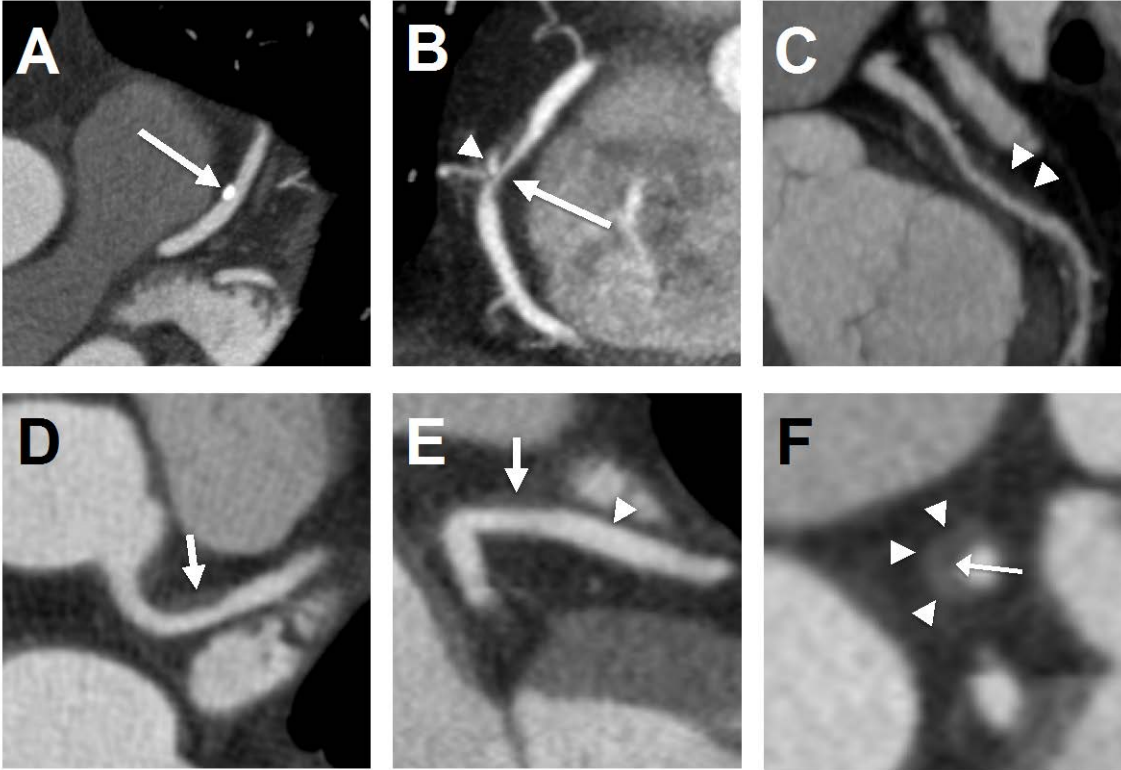

**eFigure 2. Kaplan–Meier Estimates of the Composite Secondary End Point of Cardiovascular Death, Myocardial Infarction, or Hospitalization for Unstable Angina and Tertiary End Point of Death, or Myocardial Infarction as a Function of Time After Randomization.**

A. The figure shows Kaplan-Meier estimates for the composite secondary end point of cardiovascular death, myocardial infarction, or hospitalization for unstable angina stratified by the presence of high-risk plaque (HRP) and adjusted for  $\geq 70\%$  stenosis in any coronary artery or  $\geq 50\%$  in the left main coronary artery and ASCVD risk score.

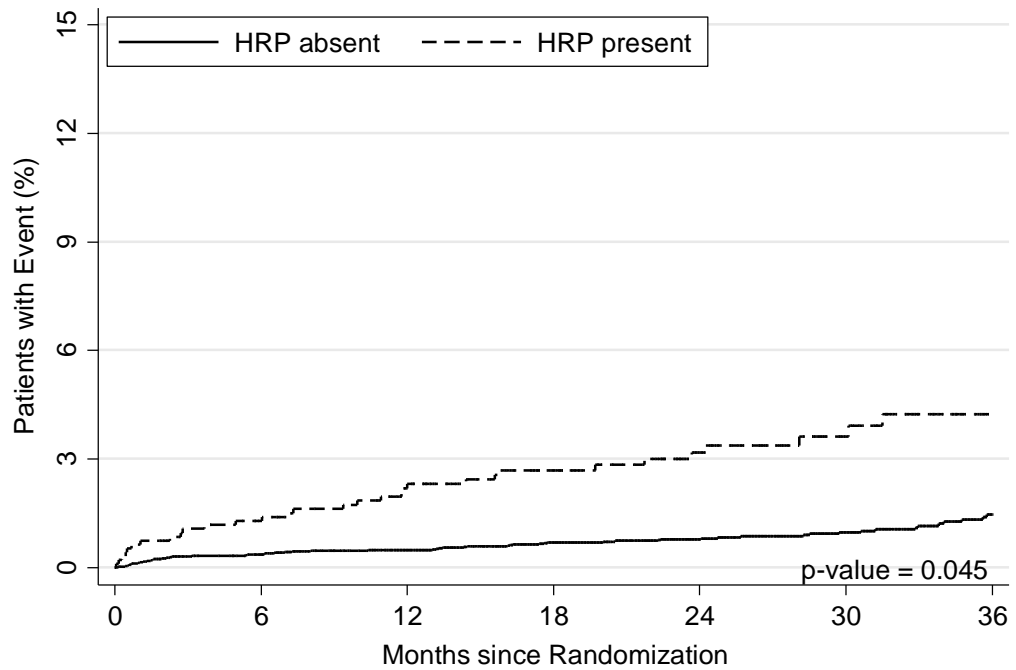

| Number at risk | 0    | 6    | 12   | 18   | 24   | 30   | 36  |
|----------------|------|------|------|------|------|------|-----|
| HRP present    | 676  | 640  | 602  | 494  | 368  | 242  | 119 |
| HRP absent     | 3739 | 3586 | 3359 | 2735 | 2062 | 1333 | 704 |

B. The figure shows Kaplan-Meier estimates for the composite tertiary end point of death, or myocardial infarction stratified by the presence of high-risk plaque (HRP) and adjusted for  $\geq 70\%$  stenosis in any coronary artery or  $\geq 50\%$  in the left main coronary artery and ASCVD risk score.

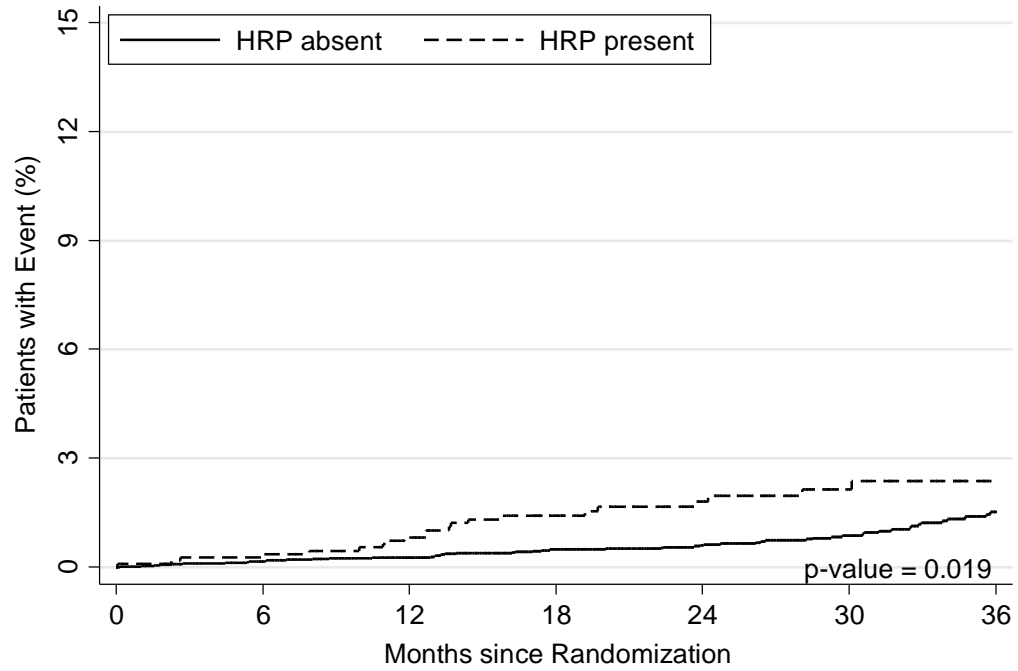

| Number at risk |  | 0    | 6    | 12   | 18   | 24   | 30   | 36  |
|----------------|--|------|------|------|------|------|------|-----|
| HRP present    |  | 676  | 664  | 633  | 521  | 397  | 258  | 133 |
| HRP absent     |  | 3739 | 3663 | 3473 | 2832 | 2169 | 1403 | 770 |

**eFigure 3. Major Adverse Cardiovascular Event Incidence Proportion (Death, Non-Fatal Myocardial Infarction, or Hospitalization for Unstable Angina) Stratified by the Degree Of Stenosis and Presence of High-Risk Plaque.**

Abbreviations: CAD, coronary artery disease; HRP, high-risk plaque; LM, left main coronary artery; MACE, major adverse cardiovascular event.

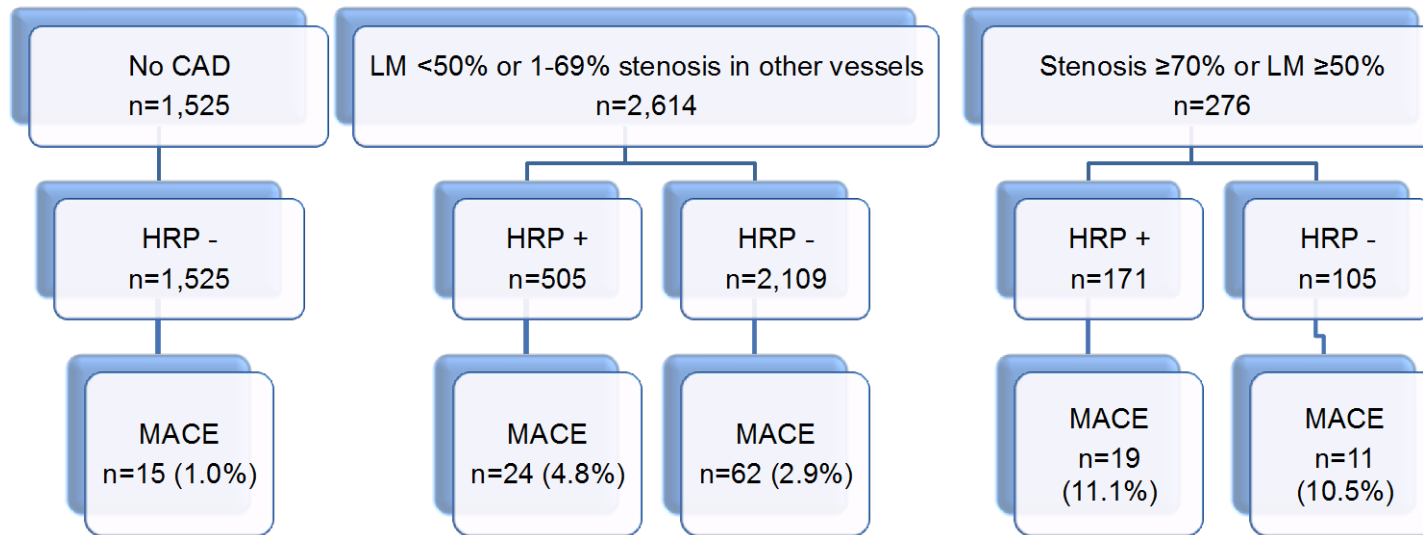

**eTable 1. Results of univariable and multivariable Cox proportional hazard analysis demonstrating the predictive value of high-risk plaque for the outcome of major adverse cardiovascular events (death, non-fatal myocardial infarction, or hospitalization for unstable angina pectoris).**

|                                                                          | Prevalence –<br>n/N (%) | Incidence<br>proportion<br>– n/N (%) | Incidence<br>proportion<br>for non-<br>positive<br>group – n/N<br>(%) | Unadjusted<br>HR (95% CI) | Adjusted HR<br>(95% CI) for<br>significant<br>stenosis | Adjusted HR<br>(95% CI) for<br>significant<br>stenosis and<br>ASCVD risk<br>score |
|--------------------------------------------------------------------------|-------------------------|--------------------------------------|-----------------------------------------------------------------------|---------------------------|--------------------------------------------------------|-----------------------------------------------------------------------------------|
| Any high-risk plaque                                                     | 676/4415<br>(15.3)      | 43/676<br>(6.3)                      | 88/3739<br>(2.4)                                                      | 2.73<br>(1.89–3.93)       | 1.82<br>(1.19–2.76)                                    | 1.72<br>(1.13–2.62)                                                               |
| Both positive remodeling<br>and low CT attenuation<br>present            | 179/4415<br>(4.1)       | 14/179<br>(7.8)                      | 117/4236<br>(2.8)                                                     | 2.85<br>(1.64–4.97)       | 1.47<br>(0.80–2.69)                                    | 1.56<br>(0.85–2.84)                                                               |
| At least one of positive<br>remodeling and low CT<br>attenuation present | 671/4415<br>(15.2)      | 43/671<br>(6.4)                      | 88/3744<br>(2.6)                                                      | 2.75<br>(1.91–3.96)       | 1.84<br>(1.21–2.79)                                    | 1.74<br>(1.14–2.65)                                                               |
| Two high-risk plaque<br>features present                                 | 258/4415<br>(5.8)       | 22/258<br>(8.5)                      | 109/4157<br>(2.6)                                                     | 3.26<br>(2.06–5.15)       | 1.73<br>(1.02–2.95)                                    | 1.71<br>(1.00–2.92)                                                               |
| Three high-risk plaque<br>features present                               | 85/4415<br>(1.9)        | 7/85<br>(8.2)                        | 124/4330<br>(2.9)                                                     | 2.73<br>(1.27–5.84)       | 1.33<br>(0.60–2.96)                                    | 1.37<br>(0.62–3.05)                                                               |

**eTable 2. Results of univariable and multivariable Cox proportional hazard analysis demonstrating the predictive value of the presence of any coronary plaque, high-risk plaque, and significant coronary stenosis for the outcome of major adverse cardiovascular events (death, non-fatal myocardial infarction, or hospitalization for unstable angina pectoris).**

| Group           | Prevalence –<br>n/N (%) | Incidence<br>proportion<br>– n/N (%) | HR<br>(95% CI)        | HR (95% CI) adjusted for<br>ASCVD risk score |
|-----------------|-------------------------|--------------------------------------|-----------------------|----------------------------------------------|
| No Plaque       | 1525/4,415<br>(34.5)    | 15/1525<br>(1.0)                     | Base                  | Base                                         |
| HRP(–) & SS(–)  | 2109/4415<br>(47.8)     | 62/2,109<br>(2.9)                    | 3.04<br>(1.73–5.34)   | 2.64<br>(1.49–4.69)                          |
| HRP(–) & SS(+)  | 105/4415<br>(2.4)       | 11/105<br>(10.5)                     | 11.75<br>(5.40–25.58) | 9.31<br>(4.21–20.61)                         |
| HRP(+ ) & SS(–) | 505/4415<br>(11.4)      | 24/505<br>(4.8)                      | 4.84<br>(2.54–9.23)   | 4.31<br>(2.25–8.26)                          |
| HRP(+ ) & SS(+) | 171/4415<br>(3.9)       | 19/171<br>(11.1)                     | 12.24<br>(6.22–24.10) | 8.68<br>(4.25–17.73)                         |

HRP(+ ) = High Risk Plaque present; HRP(–) = High Risk Plaque absent

SS(+ ) = Stenosis ≥70% in any coronary artery or ≥50% in the left main coronary artery; SS(–) = otherwise.



**eTable 3. Results of univariable and multivariable Cox proportional hazard analysis demonstrating the predictive value of high-risk plaque for the outcome of major adverse cardiovascular events (death, non-fatal myocardial infarction, or hospitalization for unstable angina pectoris) in patient subgroups.**

| Subgroup             | Prevalence –<br>n/N (%) | Incidence<br>proportion<br>– n/N (%) | Incidence<br>proportion<br>for non-positive<br>group – n/N (%) | HR<br>(95% CI)   | HR (95% CI) adjusted<br>for significant<br>stenosis and ASCVD<br>risk score |
|----------------------|-------------------------|--------------------------------------|----------------------------------------------------------------|------------------|-----------------------------------------------------------------------------|
| Overall              | 676/4,415 (15.3)        | 43/676 (6.3)                         | 88/3739 (2.4)                                                  | 2.73 (1.89–3.93) | 1.72 (1.13–2.62)                                                            |
| Sex                  |                         |                                      |                                                                |                  |                                                                             |
| Women                | 248/2,283 (10.9)        | 14/248 (5.7)                         | 40/2,035 (2.0)                                                 | 2.89 (1.58–5.33) | 2.41 (1.25–4.64)                                                            |
| Men                  | 428/2,132 (20.1)        | 29/428 (6.8)                         | 48/1,704 (2.8)                                                 | 2.43 (1.53–3.85) | 1.40 (0.81–2.39)                                                            |
| Age                  |                         |                                      |                                                                |                  |                                                                             |
| < median age         | 303/2,207 (13.7)        | 23/303 (7.6)                         | 29/1,904 (1.5)                                                 | 5.07 (2.93–8.76) | 2.33 (1.20–4.51)                                                            |
| ≥ median age         | 373/2,208 (16.9)        | 20/373 (5.4)                         | 59/1,835 (3.2)                                                 | 1.68 (1.01–2.79) | 1.36 (0.77–2.39)                                                            |
| BMI                  |                         |                                      |                                                                |                  |                                                                             |
| < median BMI         | 375/2,188 (17.1)        | 26/375 (6.9)                         | 47/1,813 (2.6)                                                 | 2.71 (1.68–4.38) | 1.95 (1.13–3.35)                                                            |
| ≥ median BMI         | 297/2,188 (13.6)        | 16/297 (5.4)                         | 41/1,891 (2.2)                                                 | 2.49 (1.40–4.43) | 1.31 (0.66–2.57)                                                            |
| Diabetes mellitus    |                         |                                      |                                                                |                  |                                                                             |
| No diabetes          | 530/3,507 (15.1)        | 34/530 (6.4)                         | 68/2,977 (2.3)                                                 | 2.83 (1.88–4.27) | 1.68 (1.04–2.70)                                                            |
| Diabetes             | 146/908 (16.1)          | 9/146 (6.2)                          | 20/762 (2.6)                                                   | 2.41 (1.10–5.30) | 1.69 (0.67–4.23)                                                            |
| Smoking              |                         |                                      |                                                                |                  |                                                                             |
| No smoking           | 256/2,158 (11.9)        | 13/256 (5.1)                         | 34/1,902 (1.8)                                                 | 2.75 (1.45–5.22) | 1.51 (0.71–3.22)                                                            |
| Smoking              | 420/2,256 (18.6)        | 30/420 (7.1)                         | 54/1,836 (2.9)                                                 | 2.51 (1.61–3.93) | 1.76 (1.06–2.93)                                                            |
| Race                 |                         |                                      |                                                                |                  |                                                                             |
| Non-Hispanic white   | 527/3,401 (15.5)        | 34/527 (6.5)                         | 70/2,874 (2.4)                                                 | 2.65 (1.76–3.99) | 1.70 (1.07–2.70)                                                            |
| Other race/ethnicity | 139/969 (14.3)          | 8/139 (5.8)                          | 18/830 (2.2)                                                   | 2.70 (1.17–6.21) | 1.78 (0.66–4.81)                                                            |
